# Supplementary material
Source: MDPI journal article supplement (https://www.mdpi.com/2073-4344/13/10/1339)
Supplement: s1 [file s1]

# Supplementary Materials

## Table of contents

**Figure S1.** EDS chart for T-PMo@ZIF-67.

**Figure S2.** Preparation process of T-PMo@ZIF-67 modified anode.

**Figure S3.** Schematic diagram of the glucose battery.

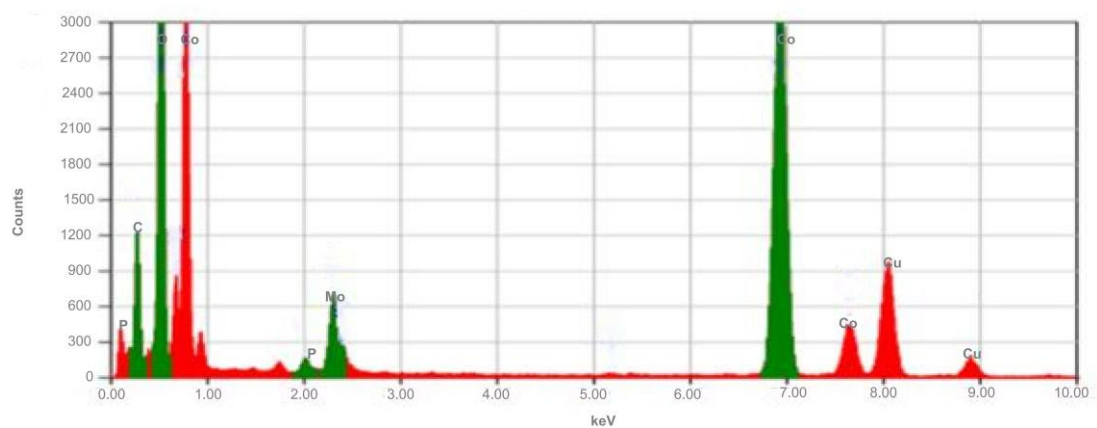

**Figure S1.** EDS chart for T-PMo@ZIF-67.

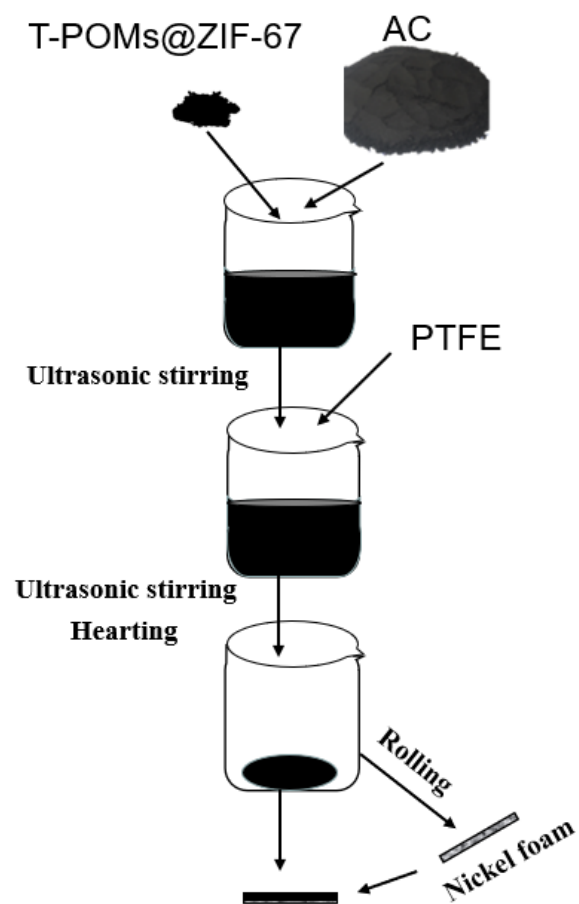

**Figure S2.** Preparation process of T-PMo@ZIF-67 modified anode.

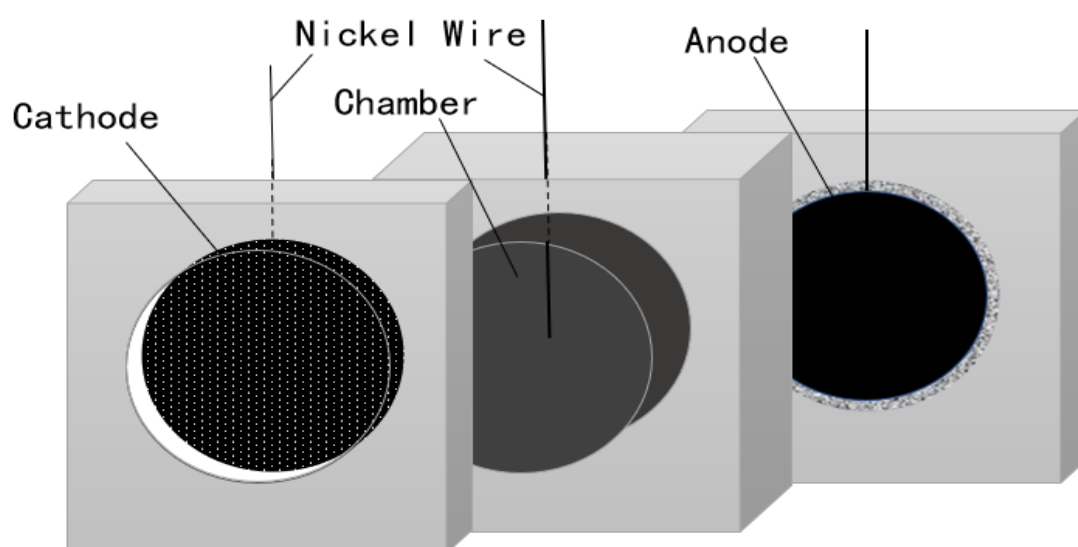

**Figure S3.** Schematic diagram of the glucose battery.
